# Supplementary material
Source: MDPI journal article supplement (https://www.mdpi.com/2079-9284/11/1/24)
Supplement: s1 [file s1]

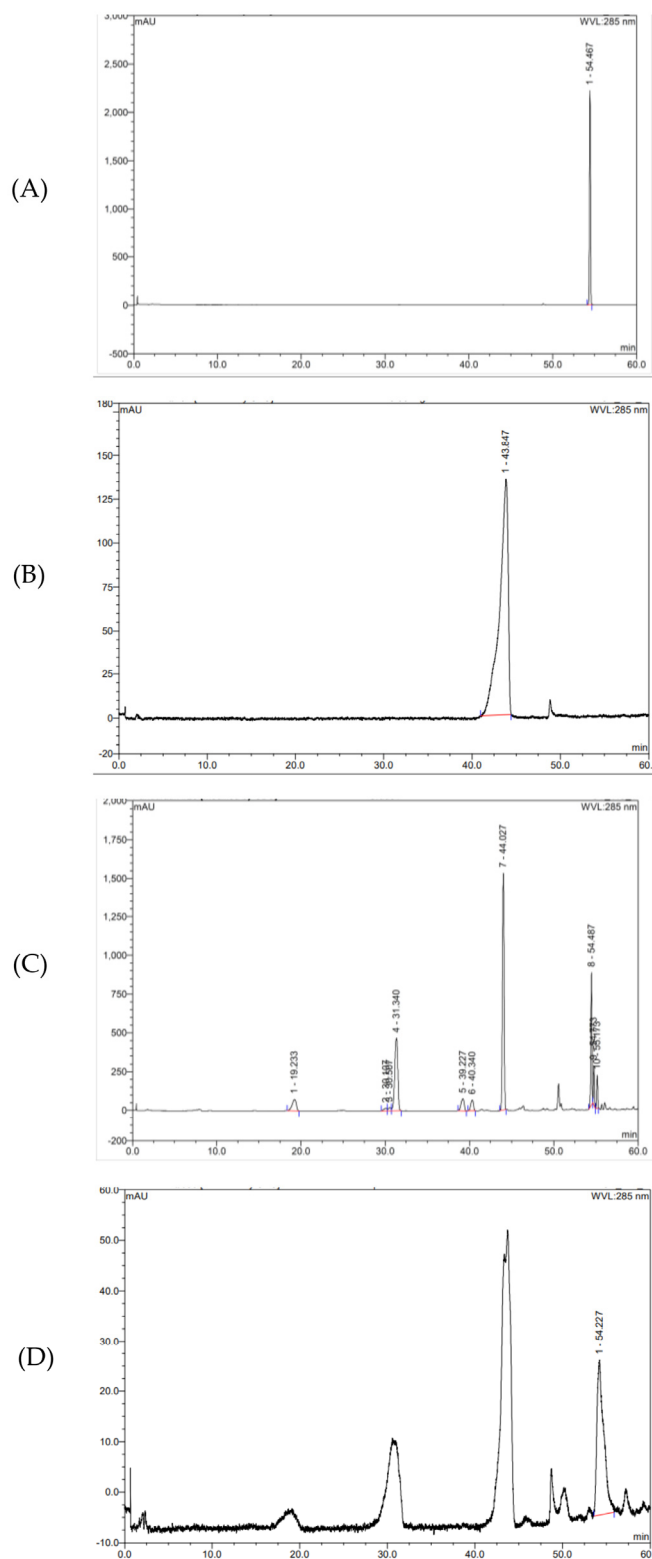

**Figure 1S** HPLC chromatogram of (A) Panduratin A standard, (B) Pinostrobin standard, (C) *B. rotunda* ethanolic extract and (D) *B. rotunda* oily extract
